# Supplementary material for: Direct Z-scheme hierarchical heterostructures of oxygen-doped g-C3N4/In2S3 with efficient photocatalytic Cr(vi) reduction activity
Source: Royal Society of Chemistry journal article supplement (doi:10.1039/d1cy01866c), 2021-01-01
Supplement: d1cy01866c1.pdf [file d1cy01866c1.pdf]

## **Electronic Supplementary Information (ESI)**

### **Direct Z-scheme hierarchical heterostructures of oxygen-doped g-C<sub>3</sub>N<sub>4</sub>/In<sub>2</sub>S<sub>3</sub> with efficient photocatalytic Cr(VI) reduction**

Anyu Liu,<sup>a,†</sup> Jianqiang Hu,<sup>a,b,†\*</sup> Jiale He,<sup>a</sup> Xinyue Huang,<sup>a</sup> Na Hu,<sup>a</sup> Yuqin Li,<sup>a</sup> Qingling Huang,<sup>a</sup> Shien Guo,<sup>a</sup> Xin Liu,<sup>a</sup> Zhen Yang,<sup>a,\*</sup> Yong Zhou<sup>b,c,\*</sup> and Zhigang Zou<sup>b,c</sup>

<sup>a</sup> Institute of Advanced Materials, College of Chemistry and Chemical Engineering, Jiangxi Normal University, Nanchang 330022, China

<sup>b</sup> National Laboratory of Solid State Microstructures, Collaborative Innovation Center of Advanced Microstructures, School of Physics, Nanjing University, Nanjing 210093, China

<sup>c</sup> Kunshan Sunlaite New Energy Co., LTd, Kunshan Innovation Institute of Nanjing University, Kunshan, Jiangsu 215347, China.

\* Corresponding authors. Email: [hujq@jxnu.edu.cn](mailto:hujq@jxnu.edu.cn) (J. Hu); [yangzhen@jxnu.edu.cn](mailto:yangzhen@jxnu.edu.cn) (Z. Yang); [zhouyong1999@nju.edu.cn](mailto:zhouyong1999@nju.edu.cn) (Y. Zhou).

† A. Liu and J. Hu contributed to this work equally.

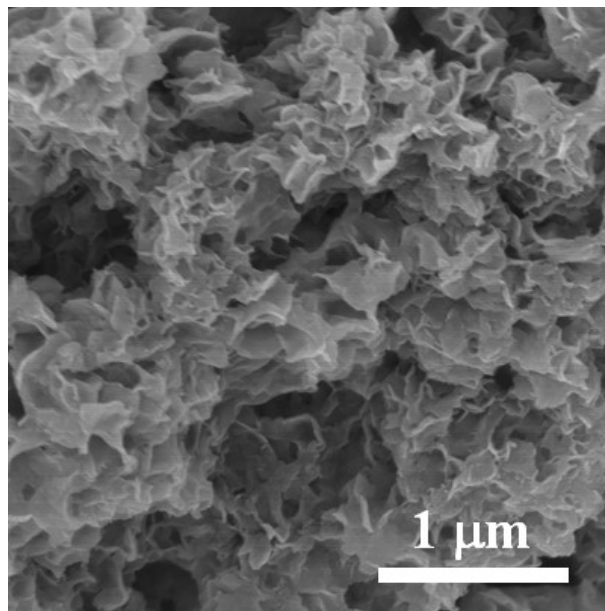

**Fig. S1** SEM image of the OCN/IS-0.9 after being coated onto a slice of FTO glass.

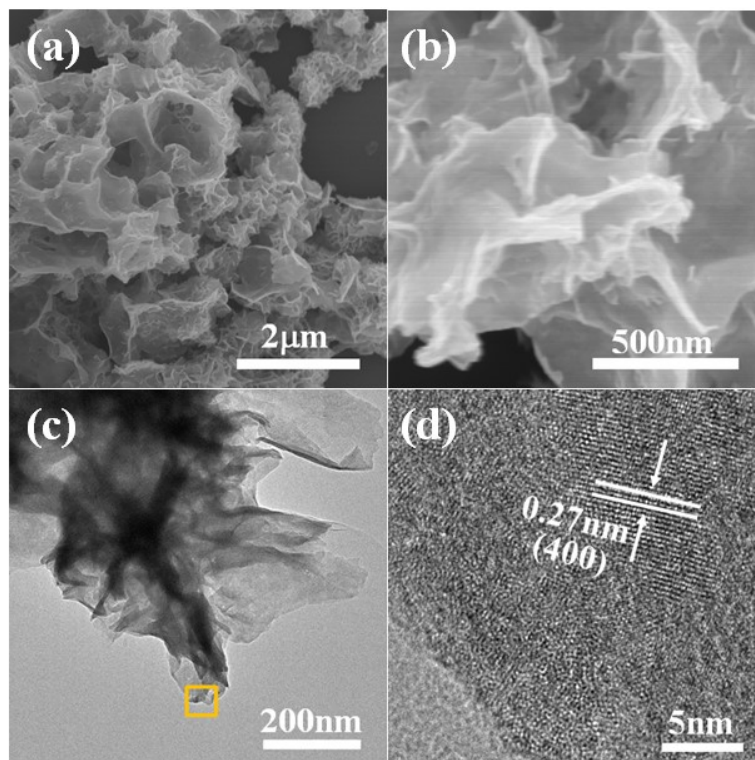

**Fig. S2** (a,b) FE-SEM and (c) TEM images of the pure IS; (d) HRTEM image of the area marked by the orange square in (c).

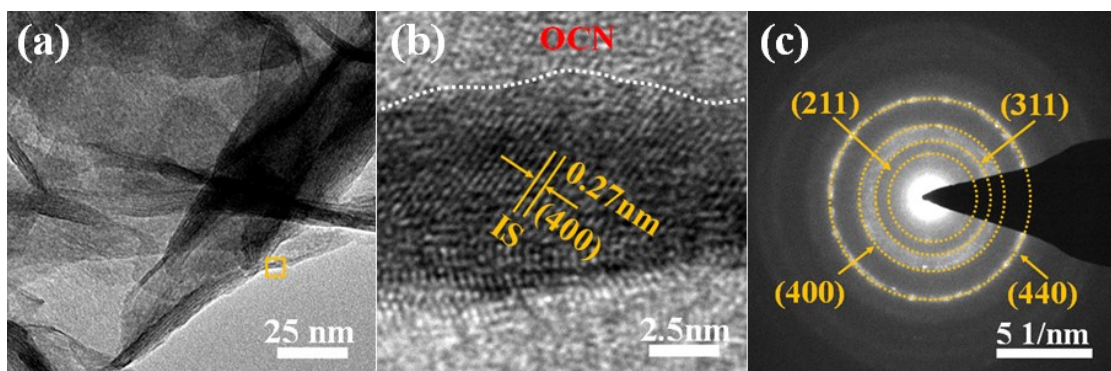

**Fig. S3** (a) TEM image of the OCN/IS-0.9; (b) HRTEM image of the area marked by the orange square in (a); (c) showing the corresponding SAED patterns in (b).

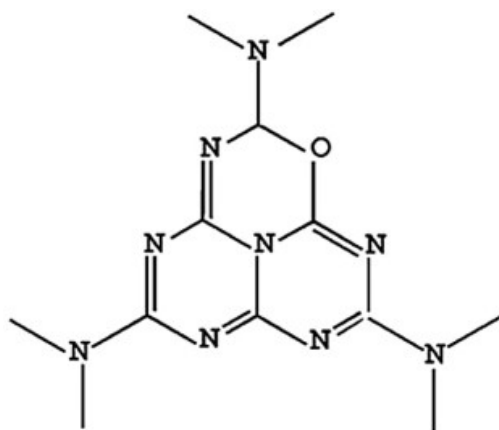

**Fig. S4** Diagram of O-doped tri-s-triazine unit. Copyright permission from Ref. S1.

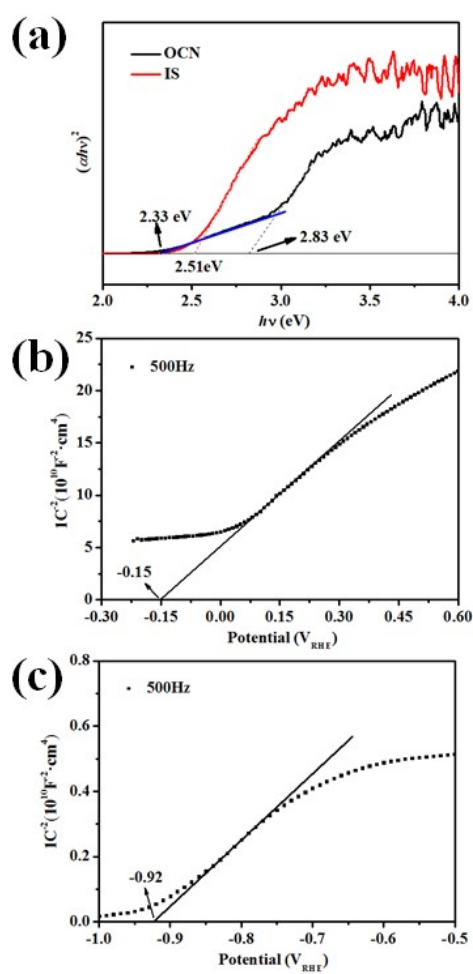

**Fig. S5** (a) The band edges of OCN and IS; Mott-Schottky plots of (b) OCN, and (c) IS.

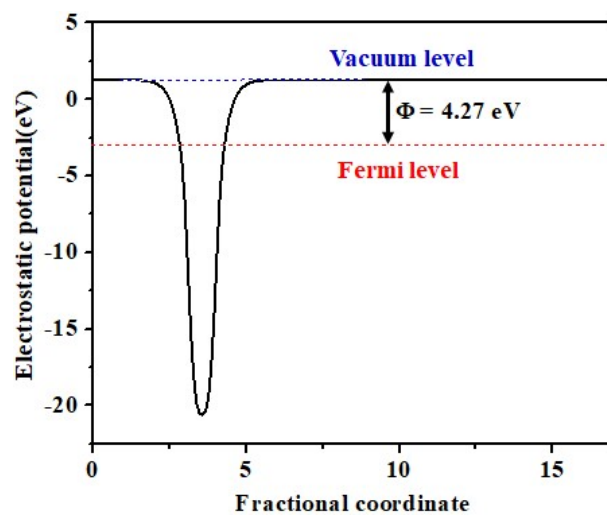

**Fig. S6** Electrostatic potentials of OCN (001) facet.

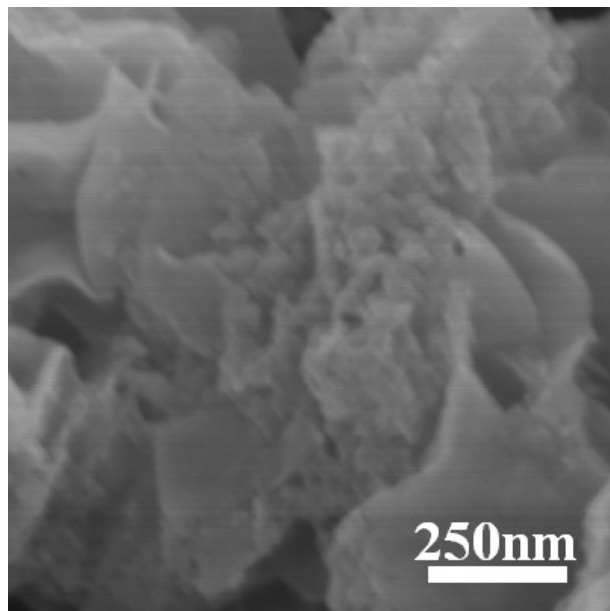

**Fig. S7** SEM image of the OCN/IS-1.05 sample.



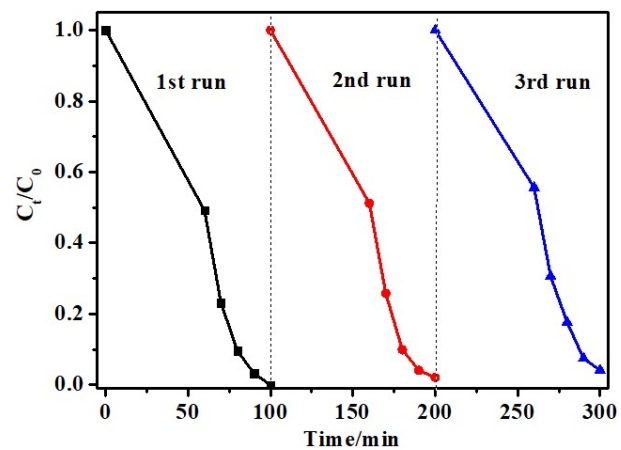

**Fig. S8** Multiple cycles of the OCN/IS-0.9 sample in the photoreduction of Cr(VI) into Cr(III) under UV visible-light irradiation for 40 min.

**Table S1.** Comparison of Cr(VI) photoreduction activity of OCN/IS-0.9 with the well-known catalysts reported in the recent literatures.

| Photocatalyst                                                                       | Catalyst Quality (mg) | Initial Cr(VI) concentration (mg/L) | Time(min) | Reduction rate (%) | Reference |
|-------------------------------------------------------------------------------------|-----------------------|-------------------------------------|-----------|--------------------|-----------|
| O-doped C <sub>3</sub> N <sub>4</sub> /In <sub>2</sub> S <sub>3</sub>               | 50                    | 35                                  | 40        | 100                | This work |
| CoS <sub>2</sub> /gC <sub>3</sub> N <sub>4</sub> -rGO nanocomposites                | 10                    | 20                                  | 120       | 99.8               | 2         |
| $\alpha$ -Fe <sub>2</sub> O <sub>3</sub> /g-C <sub>3</sub> N <sub>4</sub> composite | 100                   | 10                                  | 150       | 98                 | 3         |
| CoFe-LDH/g-C <sub>3</sub> N <sub>4</sub>                                            | 50                    | 50                                  | 90        | 100                | 4         |
| Phosphorus-doped g-C <sub>3</sub> N <sub>4</sub> /SnS nanocomposite                 | 50                    | 100                                 | 60        | 100                | 5         |
| Zero Valent Iron Doped g-C <sub>3</sub> N <sub>4</sub> /MoS <sub>2</sub>            | 30                    | 20                                  | 120       | 91.4               | 6         |
| In <sub>2</sub> S <sub>3</sub> /Gd <sub>2</sub> O <sub>3</sub>                      | 50                    | 50                                  | 55        | 96.3               | 7         |
| Bi <sub>2</sub> S <sub>3</sub> -In <sub>2</sub> S <sub>3</sub> heterojunction       | 20                    | 70                                  | 140       | 99.86              | 8         |
| In <sub>2</sub> S <sub>3</sub> /TiO <sub>2</sub> hierarchical heterostructures      | 50                    | 20                                  | 80        | 98                 | 9         |
| Mo <sub>2</sub> C/MoS <sub>2</sub> /In <sub>2</sub> S <sub>3</sub> composite        | 50                    | 40                                  | 90        | 99.1               | 10        |
| BiVO <sub>4</sub> /Bi <sub>2</sub> S <sub>3</sub>                                   | 5                     | 20                                  | 60        | 91.2               | 11        |
| Bi <sub>2</sub> MoO <sub>6</sub> /ZnO                                               | 100                   | 50                                  | 150       | 100                | 12        |
| PANI/SnS <sub>2</sub> /NRG                                                          | 300                   | 50                                  | 60        | 100                | 13        |
| BiVO <sub>4</sub> /Bi <sub>2</sub> S <sub>3</sub>                                   | 300                   | 50                                  | 150       | 100                | 14        |

## References

- (S1) P. Qiu, C. Xu, H. Chen, F. Jiang, X. Wang, R. Lu, X. Zhang, *Appl. Catal. B: Environ.*, 2017, **206**, 319-327.
- (S2) Y. Wang, S. Bao, Y. Liu, W. Yang, Y. Yu, M. Feng, K. Li, *Appl. Surf. Sci.*, 2020, **510**, 145495.
- (S3) D. Xiao, K. Dai, Y. Qu, Y. Yi, H. Chen, *Appl. Surf. Sci.*, 2015, **358**, 181-187.
- (S4) B. Ou, J. Wang, Y. Wu, S. Zhao, Z. Wang, *Chem. Eng. J.*, 2020, **380**, 122600.
- (S5) H. Sun, S. Park, *Appl. Surf. Sci.*, 2020, 531, 147325.
- (S6) X. Wang, M. Hong, F. Zhang, Z. Zhuang, Y. Yu, *ACS Sustainable Chem. Eng.*, 2016, **4**, 4055-4063.
- (S7) M. Murugalakshmi, G. Mamba, V. Muthuraj, *Appl. Surf. Sci.*, 2020, **527**, 146890.
- (S8) X. Zheng, T. Liu, J. Wen, X. Liu, *Chemosphere*, 2021, **130**, 130422.
- (S9) X. Zhang, X. Li, C. Shao, J. Li, M. Zhang, P. Zhang, K. Wang, N. Lu, Y. Liu, *J. Hazard. Mater.*, 2013, **260**, 892-900.

- (S10) X. Zhang, F. Tian, L. Qiu, M. Gao, W. Yang, Y. Liu, Y. Yu, *J. Mater. Chem. A*, 2021, **9**, 10297-10303
- (S11) X. Gao, H. B. Wu, L. Zheng, Y. Zhong, Y. Hu, X. W. Lou, *Angew. Chem., Int. Ed.*, 2014, **53**, 5917-5921.
- (S12) G. Zhang, D. Chen, N. Li, Q. Xu, H. Li, J. He, J. Lu, *Appl. Catal. B: Environ.*, 2019, **250**, 313-324.
- (S13) F. Zhang, Y. Zhang, G. Zhang, Z. Yang, D. D. Dionysiou, A. Zhu, *Appl. Catal. B: Environ.*, 2018, **236**, 53-63.
- (S14) J. Hu, F. Zhang, Y. Yang, Q. Han, Z. Li, Q. Shen, Y. Zhang, Y. Zhou, Z. Zou, *Catal. Sci. Technol.*, 2020, **10**, 3843-3847.
